# Supplementary material
Source: Springer Nature journal article supplement (https://www.springermedizin.de/resource/supplementary/12885_2007_943_MOESM1_ESM.pdf/9471842)

**Verification of the proportional hazards assumption (n=114)**

Covariates HR 95.0% CI for HR

**Base model 1, without stratification**

|                                  |      |             |
|----------------------------------|------|-------------|
| Origin                           |      |             |
| - duodenal vs. ampullary         | 0.57 | 0.21 - 1.52 |
| - distal bile duct vs. ampullary | 0.51 | 0.23 - 1.17 |
| - pancreatic vs. ampullary       | 1.19 | 0.62 - 2.31 |
| Resection margin status          | 1.82 | 1.09 - 3.06 |
| Lymph node status                | 1.55 | 0.84 - 2.86 |
| Poor differentiation             | 1.82 | 1.06 - 3.12 |
| Vessel involvement               | 1.72 | 1.02 - 2.92 |
| Perineural infiltration          | 1.66 | 0.92 - 3.02 |
| Tumour diameter (in cm)          | 1.23 | 0.96 - 1.58 |

**Base model 1, stratified by tumour origin**

|                         |      |             |
|-------------------------|------|-------------|
| Resection margin status | 1.74 | 1.03 - 2.93 |
| Lymph node status       | 1.72 | 0.90 - 3.27 |
| Poor differentiation    | 1.83 | 1.06 - 3.15 |
| Vessel involvement      | 1.65 | 0.96 - 2.84 |
| Perineural infiltration | 1.59 | 0.86 - 2.93 |
| Tumour diameter (in cm) | 1.21 | 0.94 - 1.57 |

**Base model 1, stratified by resection status**

|                                  |      |             |
|----------------------------------|------|-------------|
| Origin                           |      |             |
| - duodenal vs. ampullary         | 0.57 | 0.21 - 1.52 |
| - distal bile duct vs. ampullary | 0.52 | 0.22 - 1.18 |
| - pancreatic vs. ampullary       | 1.14 | 0.58 - 2.24 |
| Lymph node status                | 1.58 | 0.85 - 2.94 |
| Poor differentiation             | 1.91 | 1.11 - 3.28 |
| Vessel involvement               | 1.66 | 0.97 - 2.84 |
| Perineural infiltration          | 1.62 | 0.90 - 2.95 |
| Tumour diameter (in cm)          | 1.22 | 0.95 - 1.56 |

**Base model 1, stratified by lymph node status**

|                                  |      |             |
|----------------------------------|------|-------------|
| Origin                           |      |             |
| - duodenal vs. ampullary         | 0.51 | 0.18 - 1.42 |
| - distal bile duct vs. ampullary | 0.50 | 0.22 - 1.14 |
| - pancreatic vs. ampullary       | 1.21 | 0.62 - 2.35 |
| Resection margin status          | 1.85 | 1.10 - 3.12 |
| Poor differentiation             | 1.90 | 1.11 - 3.27 |
| Vessel involvement               | 1.77 | 1.04 - 3.00 |
| Perineural infiltration          | 1.66 | 0.91 - 3.01 |
| Tumour diameter (in cm)          | 1.19 | 0.91 - 1.54 |

**Base model 1, stratified by vessel infiltration**

|                                  |      |             |
|----------------------------------|------|-------------|
| Origin                           |      |             |
| - duodenal vs. ampullary         | 0.56 | 0.21 - 1.47 |
| - distal bile duct vs. ampullary | 0.56 | 0.24 - 1.28 |
| - pancreatic vs. ampullary       | 1.17 | 0.60 - 2.28 |
| Resection margin status          | 1.74 | 1.03 - 2.94 |
| Lymph node status                | 1.53 | 0.83 - 2.82 |
| Poor differentiation             | 1.75 | 1.02 - 3.02 |
| Perineural infiltration          | 1.71 | 0.94 - 3.13 |
| Tumour diameter (in cm)          | 1.23 | 0.96 - 1.58 |

**Base model 1, stratified by perineural infiltration**

|                                  |      |             |
|----------------------------------|------|-------------|
| Origin                           |      |             |
| - duodenal vs. ampullary         | 0.57 | 0.21 - 1.54 |
| - distal bile duct vs. ampullary | 0.50 | 0.22 - 1.14 |
| - pancreatic vs. ampullary       | 1.18 | 0.61 - 2.30 |
| Resection margin status          | 1.84 | 1.10 - 3.09 |
| Lymph node status                | 1.50 | 0.82 - 2.75 |
| Poor differentiation             | 1.95 | 1.13 - 3.37 |
| Vessel involvement               | 1.75 | 1.03 - 2.98 |
| Tumour diameter (in cm)          | 1.24 | 0.96 - 1.60 |

**Base model 1, stratified by presence of poor differentiation**

|                                  |      |             |
|----------------------------------|------|-------------|
| Origin                           |      |             |
| - duodenal vs. ampullary         | 0.62 | 0.23 - 1.70 |
| - distal bile duct vs. ampullary | 0.54 | 0.24 - 1.24 |
| - pancreatic vs. ampullary       | 1.16 | 0.59 - 2.29 |
| Resection margin status          | 1.86 | 1.10 - 3.13 |
| Lymph node status                | 1.50 | 0.81 - 2.77 |
| Vessel involvement               | 1.67 | 0.98 - 2.86 |
| Perineural infiltration          | 1.73 | 0.95 - 3.16 |
| Tumour diameter (in cm)          | 1.21 | 0.94 - 1.55 |

**Graphical evaluation**

(n=110; excluding perioperative mortality)

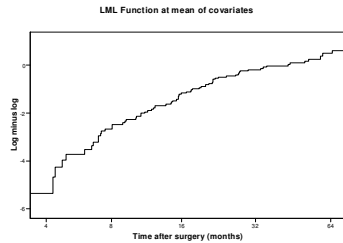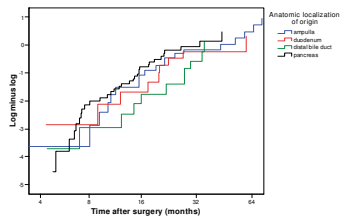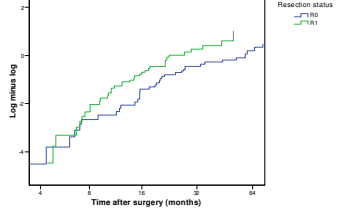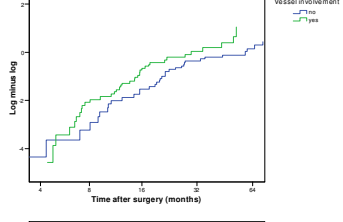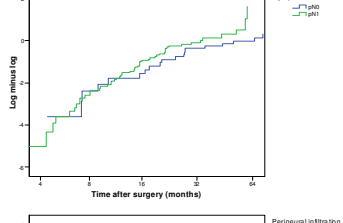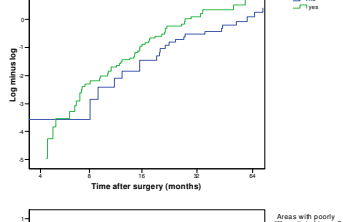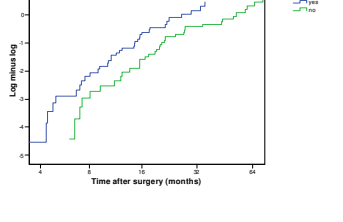

Supplement: MOESM1 [file 9471842]
